# Supplementary material for: Effect of Potassium Promoter on the Performance of Nickel-Based Catalysts Supported on MnOx in Steam Reforming of Ethanol
Source: MDPI journal article supplement (doi:10.3390/catal12060600), 2022-05-31
Supplement: s1 [file s1]

## Supporting information

# Effect of Potassium Promoter on the Performance of Nickel-Based Catalysts Supported on MnO<sub>x</sub> in Steam Reforming of Ethanol

Magdalena Greluk <sup>1,\*</sup>, Marek Rotko <sup>1</sup>, Grzegorz Słowik <sup>1</sup>, Sylwia Turczyniak-Surdacka <sup>2</sup>, Gabriela Grzybek <sup>3</sup>, Kinga Góra-Marek <sup>3</sup> and Andrzej Kotarba <sup>3</sup>

<sup>1</sup> Department of Chemical Technology, Faculty of Chemistry, Maria Curie-Skłodowska University in Lublin, Maria Curie-Skłodowska Sq. 3, 20-031 Lublin, Poland; marek.rotko@mail.umcs.pl (M.R.); grzegorz.slowik@mail.umcs.pl (G.S.)

<sup>2</sup> Biological and Chemical Research Centre, University of Warsaw, 101 Żwirki i Wigury Street, 20-089 Warsaw, Poland; sturczyniak@cnbc.uw.edu.pl

<sup>3</sup> Faculty of Chemistry, Jagiellonian University, Gronostajowa 2, 30-387 Krakow, Poland; g.grzybek@uj.edu.pl (G.G.); kinga.gora-marek@uj.edu.pl (K.G.-M.); ak@uj.edu.pl (A.K.)

\* Correspondence: magdalena.greluk@mail.umcs.pl; Tel.: +48-81-537-55-14; Fax: +48-81-537-55-65

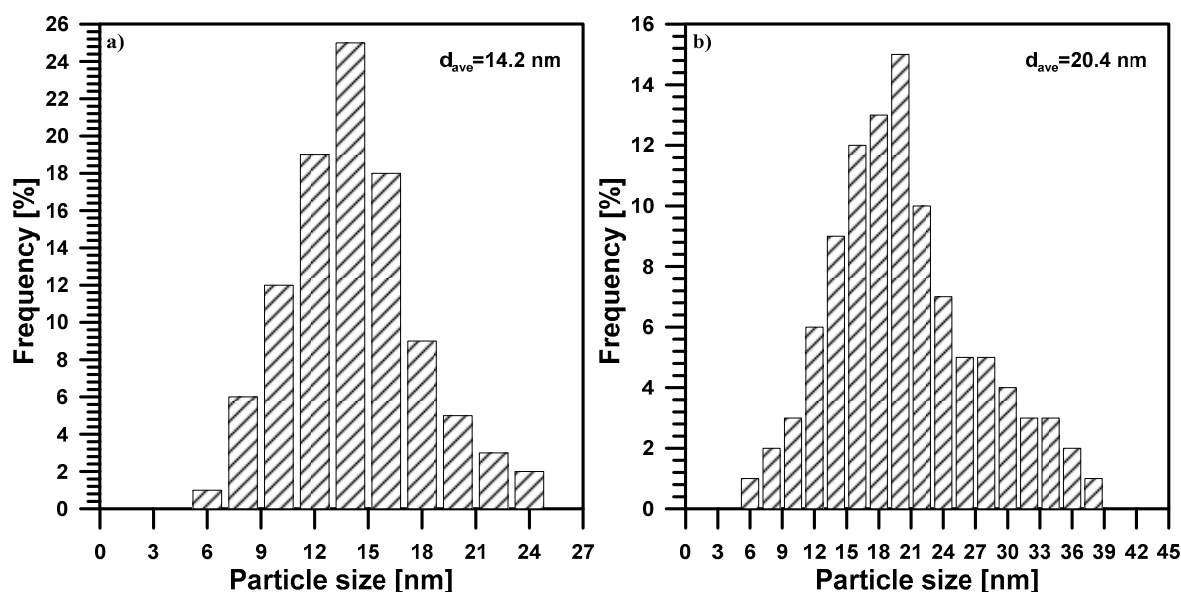

**Figure S1.** Particle size distribution histograms for (a) Ni/MnO<sub>x</sub> and (b) KNi/MnO<sub>x</sub> catalysts reduced at 500 °C. Size distribution of particles determined from measurement of at least 200 particles from representative HRTEM images.

The XRD patterns of the as-prepared and reduced with hydrogen at 500 °C MnO<sub>x</sub> support are shown in Fig. S2. For as-prepared MnO<sub>x</sub> support, the diffraction peaks at 2 $\theta$  exhibited a mixed phase structure of Mn<sub>2</sub>O<sub>3</sub> and Mn<sub>3</sub>O<sub>4</sub>. The diffraction peaks of Mn<sub>2</sub>O<sub>3</sub> are centered around 22.9°, 33.2°, 49.3°, 55.5° and 65.7°, and the diffraction peaks of Mn<sub>3</sub>O<sub>4</sub> are centered at 2 $\theta$  angles of around 28.9°, 31.0°, 32.2°, 35.8°, 38.2°, 44.5°, 50.7°, 54.3°, 56.2°, 58.8°, 60.2°, 64.7° and 74.5°. After reduction of the sample with hydrogen at 500 °C, the XRD pattern indicates

only crystalline peaks for cubic structure of MnO. Sharp diffraction peaks, indicating high crystallinity, are at  $2\theta$  angles of  $34.8^\circ$ ,  $40.3^\circ$ ,  $58.3^\circ$ ,  $69.5^\circ$ ,  $73.0^\circ$ ,  $87.3^\circ$  and  $97.7^\circ$  [37-41].

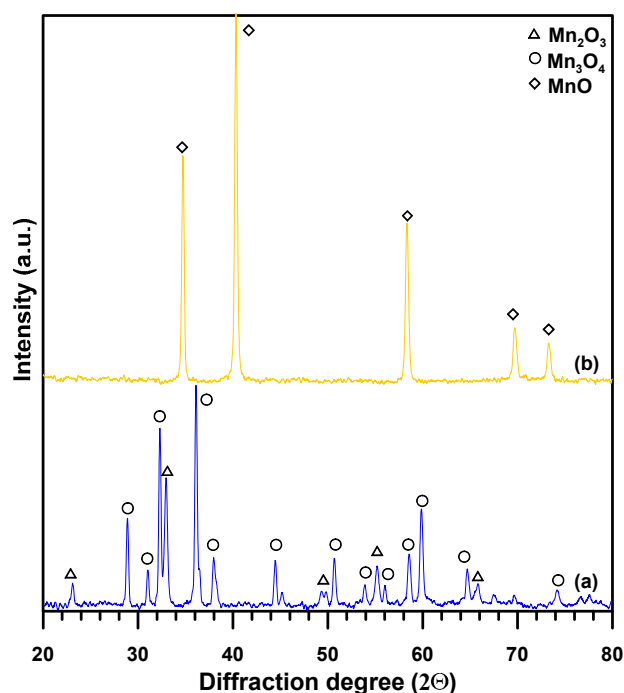

**Figure S2.** XRD patterns of (a) calcined and (b) reduced at  $500^\circ\text{C}$  of  $\text{MnO}_x$  support.

**Table S1.** XRD details with  $2\theta$ , and  $hkl$  values of the obtained crystalline phases for as-prepared and reduced with hydrogen at  $500^\circ\text{C}$  of  $\text{Ni/MnO}_x$  and  $\text{KNi/MnO}_x$  catalysts [37–42].

| Phase                   | $2\theta$ ( $^\circ$ ) | [hkl] |
|-------------------------|------------------------|-------|
| as-prepared samples     |                        |       |
| NiO                     | 43.2                   | 200   |
| $\text{Mn}_2\text{O}_3$ | 23.1                   | 211   |
|                         | 33.0                   | 222   |
|                         | 38.2                   | 400   |
|                         | 49.3                   | 431   |
|                         | 55.1                   | 440   |
|                         | 65.7                   | 622   |
| $\text{Mn}_3\text{O}_4$ | 29.0                   | 112   |
|                         | 36.2                   | 211   |
|                         | 45.1                   | 220   |
| reduced samples         |                        |       |
| $\text{Ni}^0$           | 44.3                   | 111   |
|                         | 51.2                   | 200   |
| MnO                     | 34.4                   | 111   |
|                         | 40.3                   | 200   |
|                         | 58.5                   | 220   |
|                         | 70.0                   | 311   |
|                         | 73.0                   | 222   |

**Table S2.** Hydrogen consumption from H<sub>2</sub>-TPR results.

|                                     | MnO <sub>x</sub> | Ni/MnO <sub>x</sub> | KNi/MnO <sub>x</sub> |
|-------------------------------------|------------------|---------------------|----------------------|
| H <sub>2</sub> consumption (mmol/g) | 5.13             | 6.55                | 8.13                 |

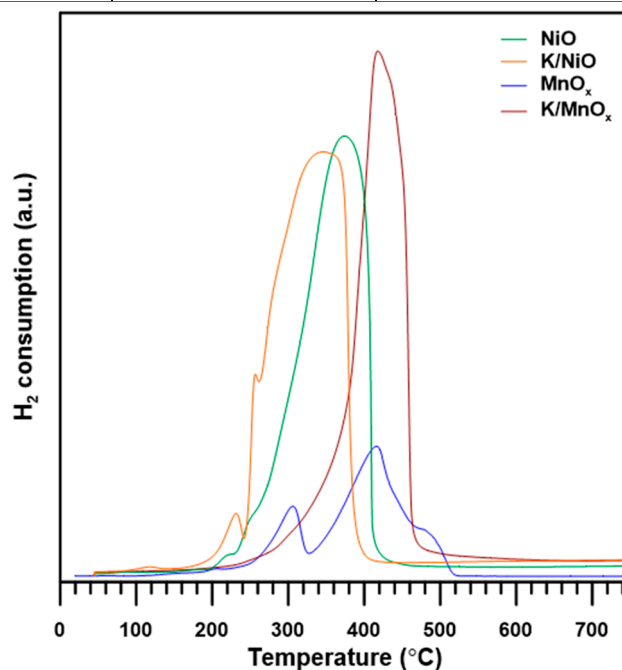

**Figure S3.** H<sub>2</sub>-TPR profiles of NiO and K/NiO samples.

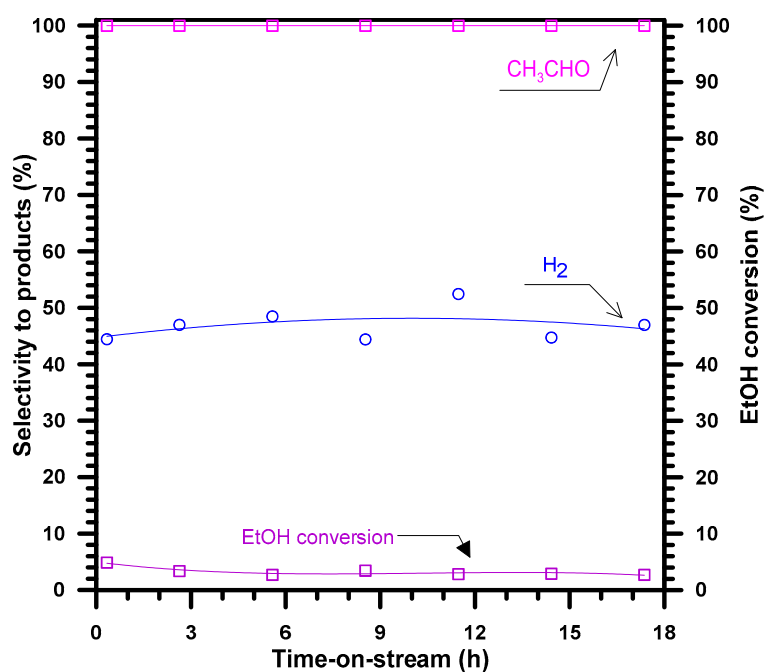

**Figure S4.** Ethanol conversion and selectivity to products over MnO<sub>x</sub> support in SRE process at 420 °C. (H<sub>2</sub>O/EtOH=12/1).

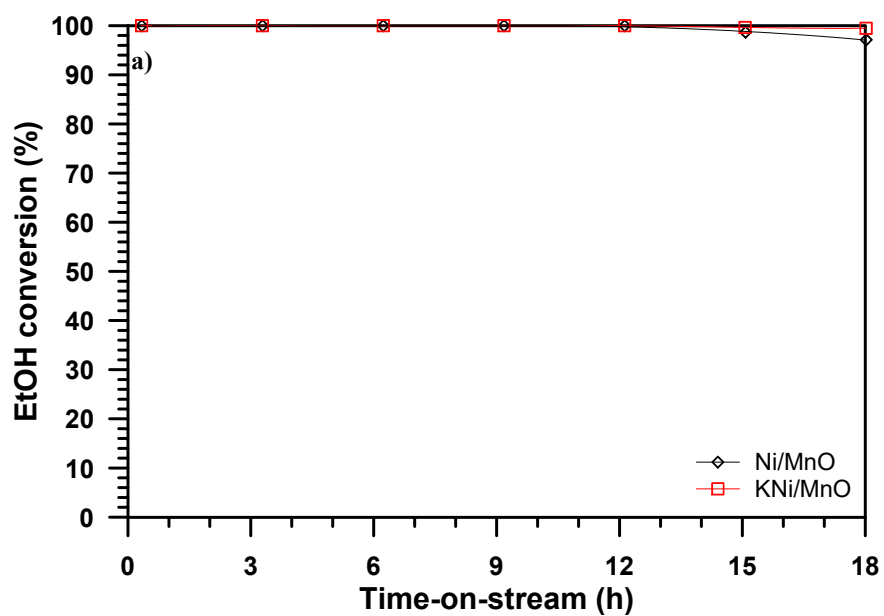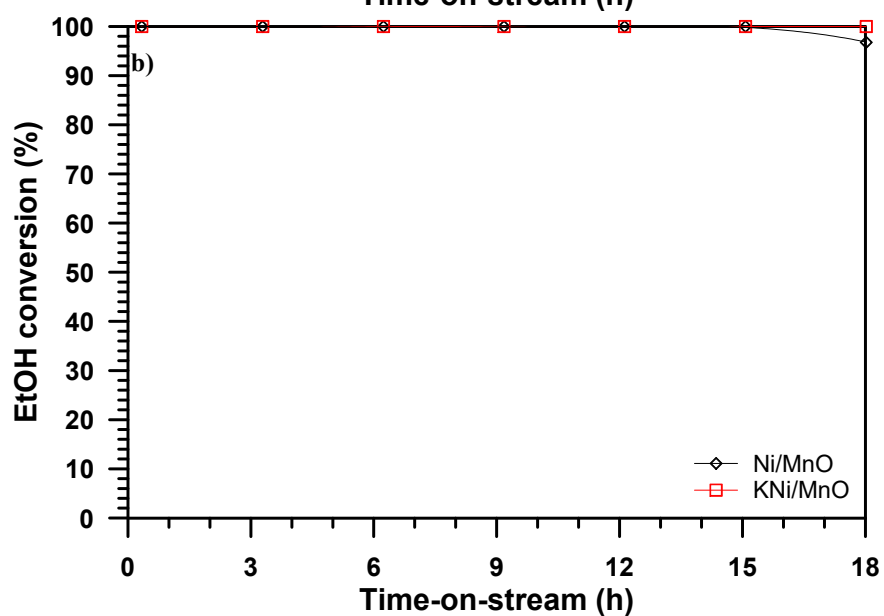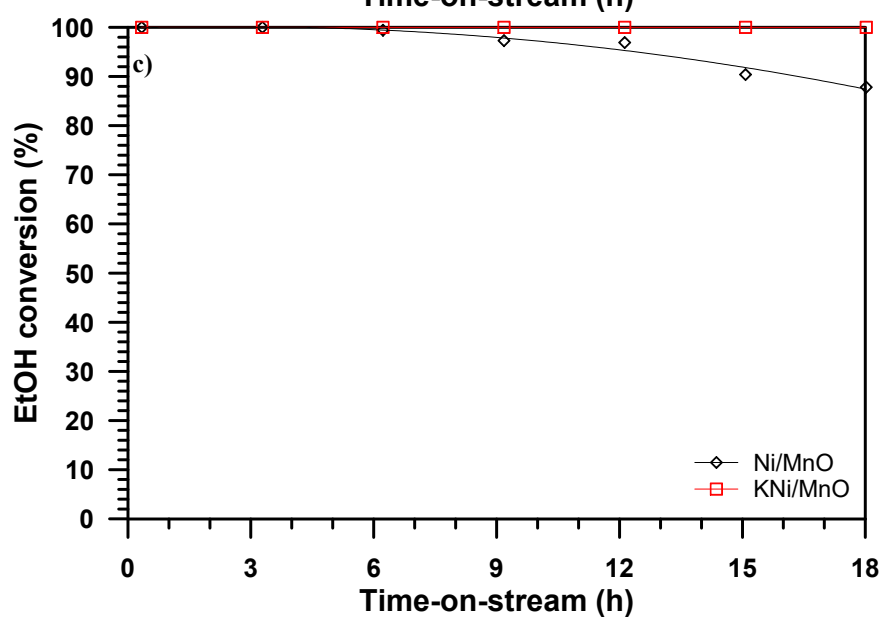

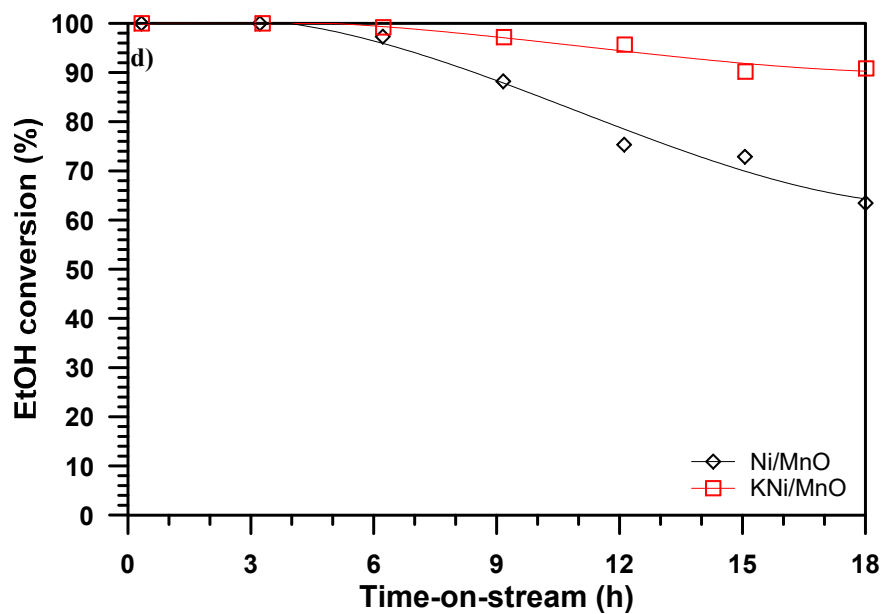

**Figure S5.** Stability tests of Ni/MnO<sub>x</sub> and KNi/MnO<sub>x</sub> catalysts at temperature of 420 °C under SRE conditions for H<sub>2</sub>O/EtOH molar ratio of (a) 12/1 (b) 9/1, (c) 6/1 and (d) 4/1.

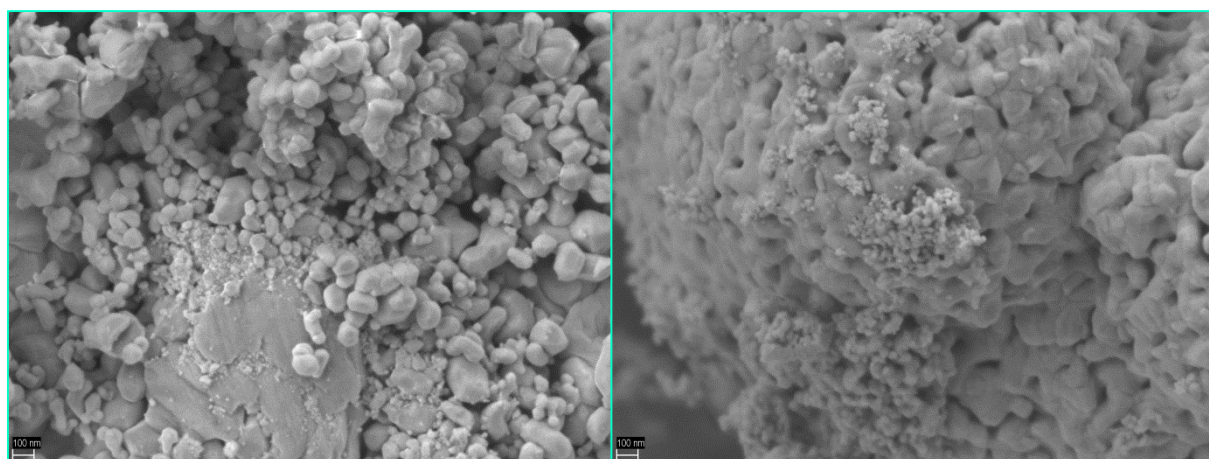

**Figure S6.** SEM images of MnO<sub>x</sub> support (a) in the fresh state and (b) after 18 hours of SRE reaction at 420 °C (H<sub>2</sub>O/EtOH molar ratio=12/1).

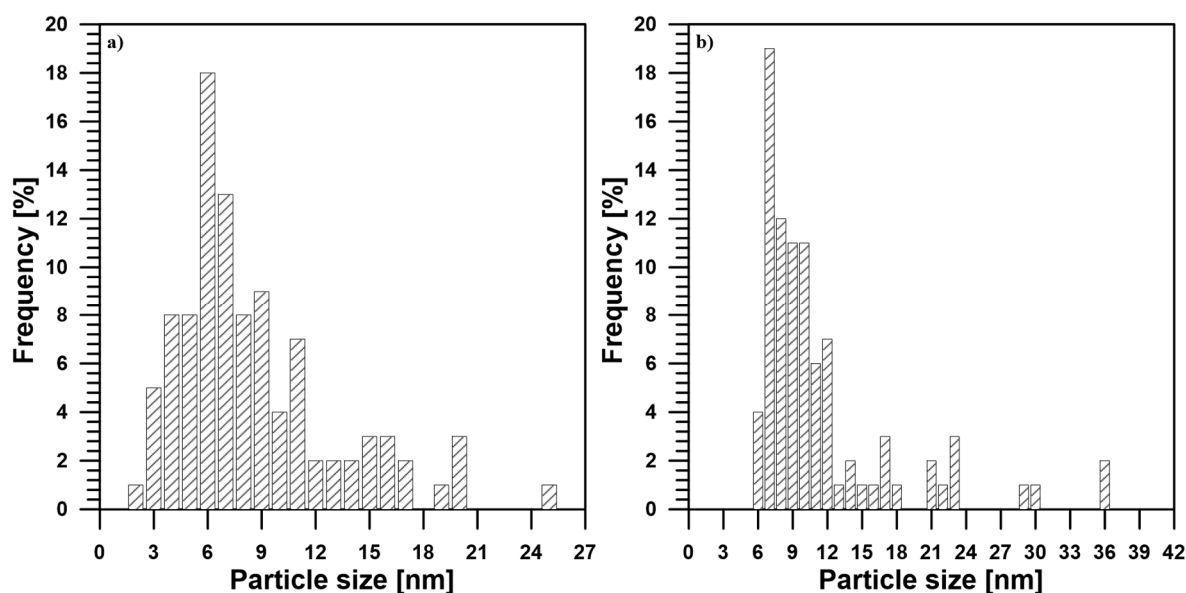

**Figure S7.** Particle size distribution histograms for (a) Ni/MnO<sub>x</sub> and (b) KNi/MnO<sub>x</sub> catalysts after SRE reaction at temperature of 420 °C under SRE conditions for H<sub>2</sub>O/EtOH molar ratio of 12/1. Size distribution of particles determined from measurement of at least 200 particles from representative HRTEM images.

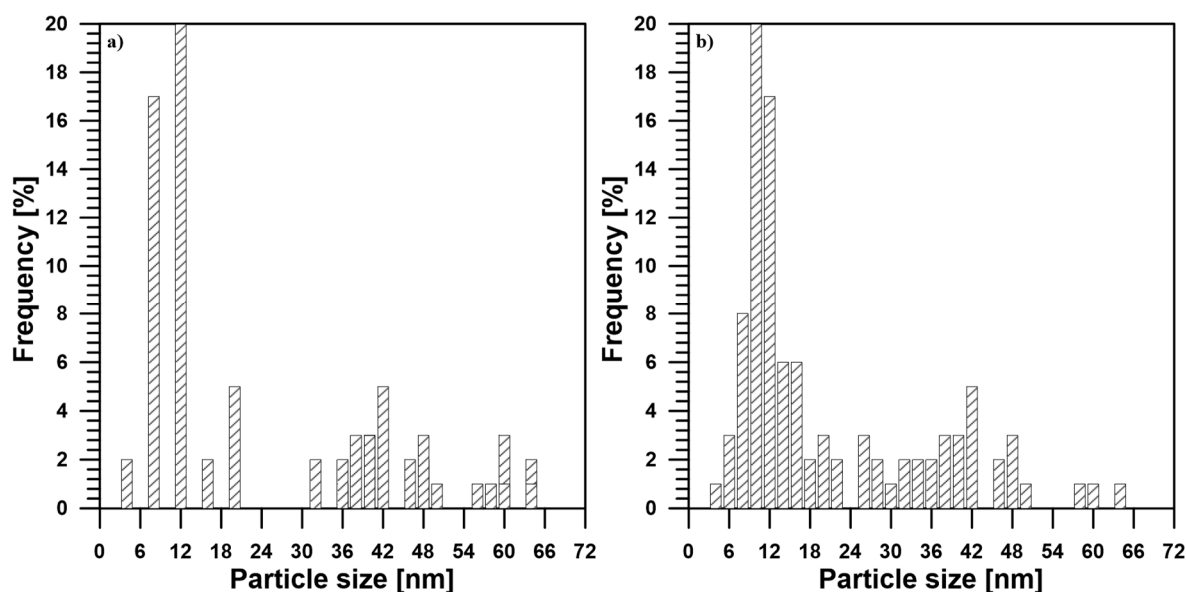

**Figure S8.** Particle size distribution histograms for (a) Ni/MnO<sub>x</sub> and (b) KNi/MnO<sub>x</sub> catalysts after SRE reaction at temperature of 420 °C under SRE conditions for H<sub>2</sub>O/EtOH molar ratio of 4/1. Size distribution of particles determined from measurement of at least 200 particles from representative HRTEM images.
